# Supplementary material
Source: PubMed Central journal article supplement (PMC6289862)
Supplement: NIHMS972783-supplement-Supporting_Information.pdf [file NIHMS972783-supplement-Supporting_Information.pdf]

### Supplemental Table 1. CyTOF antibody panel

Antibodies were either purchased pre-conjugated from Fluidigm (formerly DVS Sciences) or purchased purified and conjugated in-house using MaxPar X8 Polymer Kits (Fluidigm) according to the manufacturer's instructions.

Antibodies used for CD45 barcoding are highlighted in blue

Intracellular antibodies are highlighted in yellow

| Tag    | Marker   | Clone       | Source    | Used for<br>viSNE |
|--------|----------|-------------|-----------|-------------------|
| 89Y    | CD45_89  | HI30        | Biolegend |                   |
| 115 In | CD45_115 | HI30        | Biolegend |                   |
| 141 Pr | HLA-ABC  | W6-32       | Biolegend | Y                 |
| 142 Nd | CD19     | HIB19       | Fluidigm  | Y                 |
| 143 Nd | CD117    | 104D2       | Fluidigm  | Y                 |
| 144 Nd | CD141    | BDCA-3      | Biolegend | Y                 |
| 145 Nd | anti-PE  | PE001       | Fluidigm  | Y                 |
| 146 Nd | CD64     | 10.1        | Fluidigm  | Y                 |
| 147 Sm | Gata6    | 2F10G3      | Abcam     |                   |
| 148 Nd | CD16     | 3G8         | Fluidigm  | Y                 |
| 151 Eu | CD123    | 6H6         | Fluidigm  | Y                 |
| 152 Sm | CD66b    | 80H3        | Fluidigm  | Y                 |
| 153 Eu | CD1c     | BDCA-1      | Fluidigm  | Y                 |
| 154 Sm | CD163    | GHI/61      | Fluidigm  | Y                 |
| 156 Gd | CD86     | IT2.2       | Fluidigm  | Y                 |
| 158 Gd | CD33     | WM53        | Fluidigm  | Y                 |
| 159 Tb | CD45_159 | HI30        | Biolegend |                   |
| 160 Gd | CD14     | M5E2        | Fluidigm  | Y                 |
| 162 Dy | CD11c    | Bu15        | Fluidigm  | Y                 |
| 163 Dy | anti-APC | APC003      | Fluidigm  | Y                 |
| 164 Dy | CCR3     | 5E8         | Biolegend |                   |
| 165 Ho | CD116    | 4H1         | Fluidigm  | Y                 |
| 166 Er | CD24     | ML5         | Fluidigm  | Y                 |
| 168 Er | CD206    | 15-2        | Fluidigm  | Y                 |
| 169 Tm | PPARg    | 3A4A9,1E6A1 | Abcam     | Y                 |
| 170 Er | CD3      | UCHT1       | Fluidigm  | Y                 |
| 171 Yb | CD68     | Y1/82A      | Fluidigm  | Y                 |
| 172 Yb | CD11b    | M1/70       | Fluidigm  | Y                 |
| 174 Yb | HLA-DR   | L243        | Fluidigm  | Y                 |
| 175 Lu | PD-L1    | 29E.2A3     | Fluidigm  | Y                 |
| 176 Yb | CD56     | NCAM16.2    | Fluidigm  | Y                 |
| PE     | CCR2     | K036C2      | Biolegend |                   |
| APC    | CD115    | 9-4D2-1E4   | Biolegend |                   |
